# Supplementary material
Source: publisher figshare collection journal article supplement (https://acs.figshare.com/ndownloader/files/5730144)
Supplement: Supplementary file 1 [file 5730144]

  
data_datam 
  
_audit_creation_method            SHELXL-97 
_chemical_name_systematic 
; 
 ? 
; 
_chemical_name_common             'UCR-15' 
_chemical_melting_point           ? 
_chemical_formula_moiety          ? 
_chemical_formula_sum 
 'In44 S72' 
_chemical_formula_weight          7360.40 
  
loop_ 
 _atom_type_symbol 
 _atom_type_description 
 _atom_type_scat_dispersion_real 
 _atom_type_scat_dispersion_imag 
 _atom_type_scat_source 
 'S'  'S'   0.1246   0.1234 
 'International Tables Vol C Tables 4.2.6.8 and 6.1.1.4' 
 'In'  'In'  -0.7276   1.3100 
 'International Tables Vol C Tables 4.2.6.8 and 6.1.1.4' 
  
_symmetry_cell_setting            Tetragonal 
_symmetry_space_group_name_H-M    I4(1)/a 
  
loop_ 
 _symmetry_equiv_pos_as_xyz 
 'x, y, z' 
 '-x+1/2, -y, z+1/2' 
 '-y+3/4, x+1/4, z+1/4' 
 'y+3/4, -x+3/4, z+3/4' 
 'x+1/2, y+1/2, z+1/2' 
 '-x+1, -y+1/2, z+1' 
 '-y+5/4, x+3/4, z+3/4' 
 'y+5/4, -x+5/4, z+5/4' 
 '-x, -y, -z' 
 'x-1/2, y, -z-1/2' 
 'y-3/4, -x-1/4, -z-1/4' 
 '-y-3/4, x-3/4, -z-3/4' 
 '-x+1/2, -y+1/2, -z+1/2' 
 'x, y+1/2, -z' 
 'y-1/4, -x+1/4, -z+1/4' 
 '-y-1/4, x-1/4, -z-1/4' 
  
_cell_length_a                    24.597(6) 
_cell_length_b                    24.597(6) 
_cell_length_c                    44.088(15) 
_cell_angle_alpha                 90.00 
_cell_angle_beta                  90.00 
_cell_angle_gamma                 90.00 
_cell_volume                      26674(13) 
_cell_formula_units_Z             4 
_cell_measurement_temperature     293(2) 
_cell_measurement_reflns_used     ? 
_cell_measurement_theta_min       ? 
_cell_measurement_theta_max       ? 
  
_exptl_crystal_description        ? 
_exptl_crystal_colour             ? 
_exptl_crystal_size_max           ? 
_exptl_crystal_size_mid           ? 
_exptl_crystal_size_min           ? 
_exptl_crystal_density_meas       ? 
_exptl_crystal_density_diffrn     1.833 
_exptl_crystal_density_method     'not measured' 
_exptl_crystal_F_000              13232 
_exptl_absorpt_coefficient_mu     4.289 
_exptl_absorpt_correction_type    none 
_exptl_absorpt_correction_T_min   ? 
_exptl_absorpt_correction_T_max   ? 
_exptl_absorpt_process_details    ? 
  
_exptl_special_details 
; 
 ? 
; 
  
_diffrn_ambient_temperature       293(2) 
_diffrn_radiation_wavelength      0.71073 
_diffrn_radiation_type            MoK\a 
_diffrn_radiation_source          'fine-focus sealed tube' 
_diffrn_radiation_monochromator   graphite 
_diffrn_measurement_device_type   'CCD area detector' 
_diffrn_measurement_method        'phi and omega scans' 
_diffrn_detector_area_resol_mean  ? 
_diffrn_standards_number          ? 
_diffrn_standards_interval_count  ? 
_diffrn_standards_interval_time   ? 
_diffrn_standards_decay_%         ? 
_diffrn_reflns_number             42057 
_diffrn_reflns_av_R_equivalents   0.2197 
_diffrn_reflns_av_sigmaI/netI     0.1496 
_diffrn_reflns_limit_h_min        -23 
_diffrn_reflns_limit_h_max        23 
_diffrn_reflns_limit_k_min        -22 
_diffrn_reflns_limit_k_max        23 
_diffrn_reflns_limit_l_min        -42 
_diffrn_reflns_limit_l_max        36 
_diffrn_reflns_theta_min          1.61 
_diffrn_reflns_theta_max          20.00 
_reflns_number_total              6221 
_reflns_number_gt                 2616 
_reflns_threshold_expression      >2sigma(I) 
  
_computing_data_collection        'Bruker SMART' 
_computing_cell_refinement        'Bruker SMART' 
_computing_data_reduction         'Bruker SHELXTL' 
_computing_structure_solution     'SHELXS-97 (Sheldrick, 1990)' 
_computing_structure_refinement   'SHELXL-97 (Sheldrick, 1997)' 
_computing_molecular_graphics     'Bruker SHELXTL' 
_computing_publication_material   'Bruker SHELXTL' 
  
_refine_special_details 
; 
 Refinement of F^2^ against ALL reflections.  The weighted R-factor wR and 
 goodness of fit S are based on F^2^, conventional R-factors R are based 
 on F, with F set to zero for negative F^2^. The threshold expression of 
 F^2^ > 2sigma(F^2^) is used only for calculating R-factors(gt) etc. and is 
 not relevant to the choice of reflections for refinement.  R-factors based 
 on F^2^ are statistically about twice as large as those based on F, and R- 
 factors based on ALL data will be even larger. 
; 
  
_refine_ls_structure_factor_coef  Fsqd 
_refine_ls_matrix_type            full 
_refine_ls_weighting_scheme       calc 
_refine_ls_weighting_details 
 'calc w=1/[\s^2^(Fo^2^)+(0.1000P)^2^+0.0000P] where P=(Fo^2^+2Fc^2^)/3' 
_atom_sites_solution_primary      direct 
_atom_sites_solution_secondary    difmap 
_atom_sites_solution_hydrogens    geom 
_refine_ls_hydrogen_treatment     mixed 
_refine_ls_extinction_method      none 
_refine_ls_extinction_coef        ? 
_refine_ls_number_reflns          6221 
_refine_ls_number_parameters      265 
_refine_ls_number_restraints      0 
_refine_ls_R_factor_all           0.1887 
_refine_ls_R_factor_gt            0.0769 
_refine_ls_wR_factor_ref          0.2517 
_refine_ls_wR_factor_gt           0.2082 
_refine_ls_goodness_of_fit_ref    1.062 
_refine_ls_restrained_S_all       1.062 
_refine_ls_shift/su_max           0.050 
_refine_ls_shift/su_mean          0.009 
  
loop_ 
 _atom_site_label 
 _atom_site_type_symbol 
 _atom_site_fract_x 
 _atom_site_fract_y 
 _atom_site_fract_z 
 _atom_site_U_iso_or_equiv 
 _atom_site_adp_type 
 _atom_site_occupancy 
 _atom_site_symmetry_multiplicity 
 _atom_site_calc_flag 
 _atom_site_refinement_flags 
 _atom_site_disorder_assembly 
 _atom_site_disorder_group 
In1 In 0.35630(11) 0.32025(11) 0.87536(6) 0.044(9) Uani 1 1 d . . . 
In2 In 0.5000 0.2500 0.74749(8) 0.041(9) Uani 1 2 d S . . 
In3 In 0.28276(10) 0.17641(11) 0.87521(6) 0.041(9) Uani 1 1 d . . . 
In4 In 0.39311(11) 0.21267(11) 0.81259(6) 0.042(9) Uani 1 1 d . . . 
In5 In 0.46431(10) 0.35670(11) 0.81219(7) 0.043(9) Uani 1 1 d . . . 
In6 In 0.31709(11) 0.43098(11) 0.93798(6) 0.043(9) Uani 1 1 d . . . 
In7 In 0.57113(11) 0.39439(11) 0.74687(6) 0.045(9) Uani 1 1 d . . . 
In8 In 0.0000 0.2500 1.06009(8) 0.050(9) Uani 1 2 d S . . 
In9 In 0.24452(11) 0.28281(11) 0.93837(6) 0.046(9) Uani 1 1 d . . . 
In10 In 0.21491(12) 0.39059(11) 1.00005(6) 0.050(9) Uani 1 1 d . . . 
In11 In -0.01105(11) 0.36661(11) 1.12475(7) 0.049(9) Uani 1 1 d . . . 
In12 In 0.10016(12) 0.37046(12) 1.06209(7) 0.054(9) Uani 1 1 d . . . 
S301 S 0.3147(4) 0.2509(4) 0.8414(2) 0.039(9) Uani 1 1 d . . . 
S302 S 0.3869(4) 0.3954(4) 0.8420(2) 0.042(9) Uani 1 1 d . . . 
S303 S 0.2784(4) 0.3574(4) 0.9050(2) 0.043(9) Uani 1 1 d . . . 
S304 S 0.4953(4) 0.4315(4) 0.7782(2) 0.049(9) Uani 1 1 d . . . 
S305 S 0.4242(4) 0.2874(4) 0.7782(2) 0.041(9) Uani 1 1 d . . . 
S306 S 0.4340(4) 0.2821(4) 0.9039(2) 0.040(9) Uani 1 1 d . . . 
S307 S 0.3537(4) 0.1424(4) 0.7782(2) 0.041(9) Uani 1 1 d . . . 
S308 S -0.0631(4) 0.3027(4) 1.0925(2) 0.049(9) Uani 1 1 d . . . 
S201 S 0.2464(4) 0.1050(4) 0.8430(2) 0.056(9) Uani 1 1 d . . . 
S202 S 0.5341(4) 0.3223(4) 0.7152(2) 0.050(9) Uani 1 1 d . . . 
S203 S 0.2092(4) 0.2094(4) 0.9069(2) 0.046(9) Uani 1 1 d . . . 
S204 S 0.1740(4) 0.3163(5) 0.9707(3) 0.064(10) Uani 1 1 d . . . 
S205 S 0.1462(5) 0.4371(4) 1.0306(3) 0.061(9) Uani 1 1 d . . . 
S206 S 0.2443(4) 0.4667(4) 0.9682(2) 0.057(9) Uani 1 1 d . . . 
S207 S 0.6059(4) 0.4659(5) 0.7154(2) 0.059(9) Uani 1 1 d . . . 
S208 S 0.0404(5) 0.4279(4) 1.0930(3) 0.066(10) Uani 1 1 d . . . 
S209 S -0.0717(5) 0.4177(4) 1.1573(3) 0.066(10) Uani 1 1 d . . . 
S210 S 0.0518(5) 0.3082(5) 1.0276(3) 0.073(10) Uani 1 1 d . . . 
  
loop_ 
 _atom_site_aniso_label 
 _atom_site_aniso_U_11 
 _atom_site_aniso_U_22 
 _atom_site_aniso_U_33 
 _atom_site_aniso_U_23 
 _atom_site_aniso_U_13 
 _atom_site_aniso_U_12 
In1 0.046(9) 0.043(9) 0.042(9) -0.0007(16) 0.0052(17) -0.0028(14) 
In2 0.041(9) 0.046(9) 0.036(9) 0.000 0.000 -0.001(2) 
In3 0.037(9) 0.043(9) 0.043(9) -0.0071(15) 0.0047(15) -0.0026(14) 
In4 0.041(9) 0.045(9) 0.041(9) -0.0027(16) 0.0022(15) 0.0017(15) 
In5 0.038(9) 0.044(9) 0.046(9) 0.0022(15) 0.0055(16) -0.0020(15) 
In6 0.046(9) 0.038(9) 0.047(9) -0.0021(15) 0.0140(15) 0.0008(15) 
In7 0.045(9) 0.050(9) 0.040(9) 0.0080(16) 0.0046(16) -0.0009(15) 
In8 0.054(9) 0.047(9) 0.050(9) 0.000 0.000 -0.011(2) 
In9 0.043(9) 0.045(9) 0.051(9) -0.0073(16) 0.0146(16) -0.0013(15) 
In10 0.053(9) 0.045(9) 0.053(9) -0.0052(16) 0.0196(16) 0.0013(15) 
In11 0.054(9) 0.045(9) 0.048(9) -0.0034(15) 0.0073(17) 0.0003(16) 
In12 0.057(9) 0.049(9) 0.055(9) 0.0075(17) 0.0135(17) -0.0018(16) 
S301 0.039(11) 0.036(11) 0.043(11) -0.009(5) 0.001(5) 0.000(5) 
S302 0.041(11) 0.049(11) 0.035(11) -0.005(5) 0.016(5) -0.005(5) 
S303 0.042(11) 0.037(11) 0.051(11) -0.004(5) 0.004(6) -0.002(5) 
S304 0.045(11) 0.055(12) 0.047(11) 0.009(6) 0.009(6) 0.008(6) 
S305 0.038(11) 0.045(11) 0.039(11) 0.006(5) 0.005(5) -0.001(5) 
S306 0.052(12) 0.036(11) 0.033(11) 0.008(5) 0.000(5) -0.002(6) 
S307 0.042(11) 0.043(11) 0.037(11) -0.009(5) -0.003(5) 0.000(5) 
S308 0.048(11) 0.049(11) 0.049(11) -0.004(6) -0.001(6) -0.006(6) 
S201 0.033(11) 0.067(12) 0.067(12) -0.021(6) 0.005(6) -0.003(6) 
S202 0.064(12) 0.049(11) 0.038(11) 0.004(6) -0.001(6) -0.003(6) 
S203 0.038(11) 0.052(11) 0.050(11) -0.023(6) 0.012(5) -0.004(6) 
S204 0.045(12) 0.067(12) 0.080(13) -0.031(7) 0.022(6) -0.002(6) 
S205 0.065(12) 0.048(12) 0.071(12) -0.009(6) 0.035(7) 0.001(6) 
S206 0.059(12) 0.057(12) 0.055(12) 0.007(6) 0.028(6) 0.008(6) 
S207 0.056(12) 0.069(12) 0.052(12) 0.018(6) 0.004(6) -0.018(6) 
S208 0.072(12) 0.039(11) 0.085(13) 0.000(7) 0.030(7) -0.006(6) 
S209 0.074(13) 0.048(12) 0.076(13) -0.011(6) 0.030(7) -0.005(7) 
S210 0.095(13) 0.076(13) 0.047(12) 0.004(7) 0.011(7) -0.037(7) 
  
_geom_special_details 
; 
 All esds (except the esd in the dihedral angle between two l.s. planes) 
 are estimated using the full covariance matrix.  The cell esds are taken 
 into account individually in the estimation of esds in distances, angles 
 and torsion angles; correlations between esds in cell parameters are only 
 used when they are defined by crystal symmetry.  An approximate (isotropic) 
 treatment of cell esds is used for estimating esds involving l.s. planes. 
; 
  
loop_ 
 _geom_bond_atom_site_label_1 
 _geom_bond_atom_site_label_2 
 _geom_bond_distance 
 _geom_bond_site_symmetry_2 
 _geom_bond_publ_flag 
In1 S306 2.471(11) . ? 
In1 S302 2.480(10) . ? 
In1 S301 2.490(10) . ? 
In1 S303 2.494(10) . ? 
In2 S202 2.429(10) 6_554 ? 
In2 S202 2.429(10) . ? 
In2 S305 2.482(10) . ? 
In2 S305 2.482(10) 6_554 ? 
In3 S203 2.426(10) . ? 
In3 S201 2.429(11) . ? 
In3 S302 2.483(10) 16_657 ? 
In3 S301 2.489(10) . ? 
In4 S306 2.464(10) 16_657 ? 
In4 S301 2.493(10) . ? 
In4 S307 2.496(10) . ? 
In4 S305 2.502(10) . ? 
In5 S306 2.454(10) 11_667 ? 
In5 S305 2.473(11) . ? 
In5 S304 2.493(11) . ? 
In5 S302 2.500(10) . ? 
In6 S206 2.397(10) . ? 
In6 S201 2.434(10) 11_667 ? 
In6 S303 2.509(10) . ? 
In6 S307 2.527(10) 11_667 ? 
In7 S207 2.396(11) . ? 
In7 S202 2.434(11) . ? 
In7 S307 2.478(10) 6_554 ? 
In7 S304 2.495(10) . ? 
In8 S210 2.393(11) 6_454 ? 
In8 S210 2.393(11) . ? 
In8 S308 2.477(11) . ? 
In8 S308 2.477(11) 6_454 ? 
In9 S204 2.393(10) . ? 
In9 S203 2.438(10) . ? 
In9 S303 2.494(10) . ? 
In9 S304 2.517(11) 16_657 ? 
In10 S207 2.438(12) 16_657 ? 
In10 S205 2.445(10) . ? 
In10 S206 2.450(11) . ? 
In10 S204 2.455(11) . ? 
In11 S208 2.416(11) . ? 
In11 S209 2.421(11) . ? 
In11 S308 2.476(11) . ? 
In11 S308 2.504(11) 15_557 ? 
In12 S205 2.429(11) . ? 
In12 S208 2.451(11) . ? 
In12 S209 2.453(11) 15_557 ? 
In12 S210 2.465(12) . ? 
S302 In3 2.483(10) 11_667 ? 
S304 In9 2.517(11) 11_667 ? 
S306 In5 2.454(10) 16_657 ? 
S306 In4 2.464(10) 11_667 ? 
S307 In7 2.478(10) 6_554 ? 
S307 In6 2.527(10) 16_657 ? 
S308 In11 2.504(11) 12_668 ? 
S201 In6 2.434(10) 16_657 ? 
S207 In10 2.438(12) 11_667 ? 
S209 In12 2.453(11) 12_668 ? 
  
loop_ 
 _geom_angle_atom_site_label_1 
 _geom_angle_atom_site_label_2 
 _geom_angle_atom_site_label_3 
 _geom_angle 
 _geom_angle_site_symmetry_1 
 _geom_angle_site_symmetry_3 
 _geom_angle_publ_flag 
S306 In1 S302 110.5(3) . . ? 
S306 In1 S301 111.3(3) . . ? 
S302 In1 S301 106.2(3) . . ? 
S306 In1 S303 117.8(3) . . ? 
S302 In1 S303 105.8(3) . . ? 
S301 In1 S303 104.5(3) . . ? 
S202 In2 S202 108.2(5) 6_554 . ? 
S202 In2 S305 109.4(4) 6_554 . ? 
S202 In2 S305 107.9(3) . . ? 
S202 In2 S305 107.9(3) 6_554 6_554 ? 
S202 In2 S305 109.4(4) . 6_554 ? 
S305 In2 S305 113.8(5) . 6_554 ? 
S203 In3 S201 107.7(3) . . ? 
S203 In3 S302 109.1(3) . 16_657 ? 
S201 In3 S302 108.6(4) . 16_657 ? 
S203 In3 S301 109.5(3) . . ? 
S201 In3 S301 107.4(4) . . ? 
S302 In3 S301 114.3(3) 16_657 . ? 
S306 In4 S301 112.3(3) 16_657 . ? 
S306 In4 S307 117.1(3) 16_657 . ? 
S301 In4 S307 105.7(3) . . ? 
S306 In4 S305 110.2(4) 16_657 . ? 
S301 In4 S305 105.5(3) . . ? 
S307 In4 S305 105.1(4) . . ? 
S306 In5 S305 111.1(4) 11_667 . ? 
S306 In5 S304 117.4(4) 11_667 . ? 
S305 In5 S304 105.5(4) . . ? 
S306 In5 S302 110.6(4) 11_667 . ? 
S305 In5 S302 106.0(3) . . ? 
S304 In5 S302 105.5(3) . . ? 
S206 In6 S201 109.2(4) . 11_667 ? 
S206 In6 S303 107.6(4) . . ? 
S201 In6 S303 110.5(4) 11_667 . ? 
S206 In6 S307 110.1(4) . 11_667 ? 
S201 In6 S307 107.4(4) 11_667 11_667 ? 
S303 In6 S307 112.1(3) . 11_667 ? 
S207 In7 S202 109.6(4) . . ? 
S207 In7 S307 108.9(4) . 6_554 ? 
S202 In7 S307 109.5(4) . 6_554 ? 
S207 In7 S304 108.6(4) . . ? 
S202 In7 S304 107.7(4) . . ? 
S307 In7 S304 112.5(3) 6_554 . ? 
S210 In8 S210 106.4(6) 6_454 . ? 
S210 In8 S308 109.0(4) 6_454 . ? 
S210 In8 S308 111.5(4) . . ? 
S210 In8 S308 111.5(4) 6_454 6_454 ? 
S210 In8 S308 109.0(4) . 6_454 ? 
S308 In8 S308 109.5(5) . 6_454 ? 
S204 In9 S203 109.6(4) . . ? 
S204 In9 S303 109.9(4) . . ? 
S203 In9 S303 109.1(3) . . ? 
S204 In9 S304 107.5(4) . 16_657 ? 
S203 In9 S304 108.6(4) . 16_657 ? 
S303 In9 S304 111.9(3) . 16_657 ? 
S207 In10 S205 107.6(4) 16_657 . ? 
S207 In10 S206 114.8(4) 16_657 . ? 
S205 In10 S206 99.4(4) . . ? 
S207 In10 S204 110.7(4) 16_657 . ? 
S205 In10 S204 110.8(4) . . ? 
S206 In10 S204 112.8(4) . . ? 
S208 In11 S209 110.1(4) . . ? 
S208 In11 S308 109.5(4) . . ? 
S209 In11 S308 110.5(4) . . ? 
S208 In11 S308 109.5(4) . 15_557 ? 
S209 In11 S308 108.5(4) . 15_557 ? 
S308 In11 S308 108.7(5) . 15_557 ? 
S205 In12 S208 102.0(4) . . ? 
S205 In12 S209 109.2(4) . 15_557 ? 
S208 In12 S209 112.4(4) . 15_557 ? 
S205 In12 S210 107.0(4) . . ? 
S208 In12 S210 114.3(4) . . ? 
S209 In12 S210 111.3(5) 15_557 . ? 
In3 S301 In1 105.9(4) . . ? 
In3 S301 In4 105.8(4) . . ? 
In1 S301 In4 104.3(4) . . ? 
In1 S302 In3 107.6(4) . 11_667 ? 
In1 S302 In5 105.0(4) . . ? 
In3 S302 In5 106.2(4) 11_667 . ? 
In9 S303 In1 107.3(4) . . ? 
In9 S303 In6 108.4(4) . . ? 
In1 S303 In6 106.0(4) . . ? 
In5 S304 In7 106.9(4) . . ? 
In5 S304 In9 107.1(4) . 11_667 ? 
In7 S304 In9 108.3(4) . 11_667 ? 
In5 S305 In2 106.7(4) . . ? 
In5 S305 In4 105.2(4) . . ? 
In2 S305 In4 106.7(4) . . ? 
In5 S306 In4 104.9(4) 16_657 11_667 ? 
In5 S306 In1 104.7(4) 16_657 . ? 
In4 S306 In1 104.1(4) 11_667 . ? 
In7 S307 In4 107.6(4) 6_554 . ? 
In7 S307 In6 108.3(4) 6_554 16_657 ? 
In4 S307 In6 106.3(4) . 16_657 ? 
In11 S308 In8 109.8(4) . . ? 
In11 S308 In11 109.8(4) . 12_668 ? 
In8 S308 In11 109.5(4) . 12_668 ? 
In3 S201 In6 109.6(4) . 16_657 ? 
In2 S202 In7 109.0(4) . . ? 
In3 S203 In9 108.0(4) . . ? 
In9 S204 In10 105.8(4) . . ? 
In12 S205 In10 108.7(4) . . ? 
In6 S206 In10 105.1(4) . . ? 
In7 S207 In10 106.0(4) . 11_667 ? 
In11 S208 In12 106.1(4) . . ? 
In11 S209 In12 106.0(4) . 12_668 ? 
In8 S210 In12 105.0(4) . . ? 
  
_diffrn_measured_fraction_theta_max    1.000 
_diffrn_reflns_theta_full              20.00 
_diffrn_measured_fraction_theta_full   1.000 
_refine_diff_density_max    1.105 
_refine_diff_density_min   -0.802 
_refine_diff_density_rms    0.200 
  
